# Supplementary material
Source: publisher figshare collection journal article supplement (https://gsajournals.figshare.com/ndownloader/files/14515298)
Supplement: Supplementary file 1 [file 14515298]

## Sheet: Hoja1
Table S5. The number of new loci found for 8 traits of interest in a new version of the GWAS Catalog, compared to the number of loci already present in our first analysed dataset. The number of new publications is also given.
Functional domain	Traits	Num. Loci	New loci	New PMIDs
Cancer	Prostate cancer	106	48	1
Dermatological	Psoriasis	51	17	1
Endocrine	Body mass index	290	39	2
	Type 2 diabetes	87	9	1
Immunological	Rheumatoid arthritis	103	12	2
	Systemic lupus erythematosus	79	13	2
Skeletal	Height	346	11	1
	Waist-to-hip related traits	94	4	1
